# Supplementary material for: Electron transfer mechanism of catalytic superoxide dismutation via Cu(ii/i) complexes: evidence of cupric–superoxo/–hydroperoxo species
Source: Royal Society of Chemistry journal article supplement (doi:10.1039/c6dt02220k), 2016-01-01
Supplement: c6dt02220k1.pdf [file c6dt02220k1.pdf]

**Electron Transfer Mechanism of Catalytic Superoxide Dismutation via  
Cu(II/I) Complexes: Evidence of Cupric-superoxo/-hydroperoxo Species**

*Ram Chandra Maji,<sup>a</sup> Partha Pratim Das,<sup>b</sup> Anirban Bhandari,<sup>a</sup> Saikat Mishra,<sup>a</sup>*

*Milan Maji<sup>a</sup> and Apurba K. Patra<sup>\*a</sup>*

<sup>a</sup>Department of Chemistry, National Institute of Technology Durgapur, Mahatma Gandhi  
Avenue, Durgapur 713 209, India;

<sup>b</sup>Department of Chemistry, Indian Institute of Technology Kanpur, Kanpur 208 016, India.

## Table of contents

|    |                                                                                                                                                                                                                                                  |
|----|--------------------------------------------------------------------------------------------------------------------------------------------------------------------------------------------------------------------------------------------------|
| 1  | <b>Fig. S1:</b> Cyclic voltammograms of dissolved O <sub>2</sub> (g) in CH <sub>3</sub> CN and standardization plot.                                                                                                                             |
| 2  | <b>Fig. 4 of the main text (to show the O<sub>2</sub> quantification):</b> Cyclic voltammograms of <b>1</b> showing O <sub>2</sub> (g) liberation upon reaction with KO <sub>2</sub> . % O <sub>2</sub> (g) liberated calculation                |
| 3  | <b>Fig. S2:</b> X-Band EPR spectrum of <b>1</b> at solid state and in CH <sub>3</sub> CN-toluene glass at 77 K.                                                                                                                                  |
| 4  | <b>Fig. S3:</b> DFT optimized structures of modelled complex [(L1) <sub>2</sub> Cu] <sup>2+</sup> .                                                                                                                                              |
| 5  | <b>Table S1:</b> Comparison of bond distances and Angles of [(L1) <sub>2</sub> Cu] <sup>2+</sup> optimized structure and X-ray structure of <b>1</b> .                                                                                           |
| 6  | <b>Fig. S4:</b> DFT optimized structures of modelled complex [(L1) <sub>2</sub> Cu] <sup>+</sup> .                                                                                                                                               |
| 7  | <b>Table S2:</b> Comparison of bond distances and Angles of [(L1) <sub>2</sub> Cu] <sup>+</sup> optimized structure and X-ray structure of <b>2</b> .                                                                                            |
| 8  | <b>Fig. S5:</b> UV-Vis spectra of 0.030 mM NBT and NBT+ KO <sub>2</sub> .                                                                                                                                                                        |
| 9  | <b>Fig. S6:</b> UV-Vis spectral changes of NBT with KO <sub>2</sub> in presence of <b>1</b> .                                                                                                                                                    |
| 10 | <b>Fig. S7:</b> % inhibition of NBT vs -log [ <b>1</b> ] plot for IC <sub>50</sub> calculation.                                                                                                                                                  |
| 11 | <b>Fig. S8:</b> Cyclic voltammograms of <b>1</b> in CH <sub>3</sub> CN + KO <sub>2</sub> (5 x 0.2 equiv.) at 298 K.                                                                                                                              |
| 12 | <b>Fig. S9:</b> ESI positive mass spectrum of a solution mixture of <b>1</b> + KO <sub>2</sub> .                                                                                                                                                 |
| 13 | <b>Fig. S10:</b> FTIR spectra of <b>1</b> and [(L1) <sub>2</sub> Cu(OOH <sup>-</sup> )]ClO <sub>4</sub> .                                                                                                                                        |
| 14 | <b>Fig. S11:</b> Cyclic voltammograms of <b>1</b> showing O <sub>2</sub> (g) liberation upon reaction with KO <sub>2</sub> in pure aprotic solvent in presence of 18-Crown-6-ether at 233 K.                                                     |
| 15 | <b>Fig. S12:</b> UV-Vis spectral traces obtained from titration of CH <sub>3</sub> CN solution of <b>1</b> with a CH <sub>3</sub> CN solution of KO <sub>2</sub> + 18C6E showing <b>1</b> → <b>2</b> transformation at 233 K in aprotic solvent. |
| 16 | <b>Fig. S13:</b> Spin density plot of HOMO and LUMO of DFT optimized modelled structure of [(L1) <sub>2</sub> Cu(O <sub>2</sub> <sup>-</sup> )] <sup>+</sup> and [(L1) <sub>2</sub> Cu(OOH <sup>-</sup> )] <sup>+</sup> .                        |
| 17 | <b>Table S3:</b> Bond distances and Bond Angles of [(L1) <sub>2</sub> Cu(O <sub>2</sub> <sup>-</sup> )] <sup>+</sup> optimized structure.                                                                                                        |
| 18 | <b>Table S4:</b> Bond distances and Bond Angles of [(L1) <sub>2</sub> Cu(OOH <sup>-</sup> )] <sup>+</sup> optimized structure.                                                                                                                   |
| 19 | <b>Fig. S14:</b> UV-Vis spectra of <b>1</b> and <b>2</b> in CH <sub>3</sub> CN.                                                                                                                                                                  |
| 20 | <b>Fig. S15:</b> UV-Vis spectrum of I <sub>3</sub> <sup>-</sup> , generated from a reaction of <b>2</b> +KO <sub>2</sub> +HClO <sub>4</sub> +NaI, to quantify liberated H <sub>2</sub> O <sub>2</sub> .                                          |
| 21 | <b>Fig. S16:</b> ESI positive mass spectrum of (a) a frozen solution of <b>1</b> + O <sub>2</sub> (g), (b) a frozen solution of <b>2</b> + KO <sub>2</sub> and (c) a frozen solution of <b>1</b> + KO <sub>2</sub> .                             |

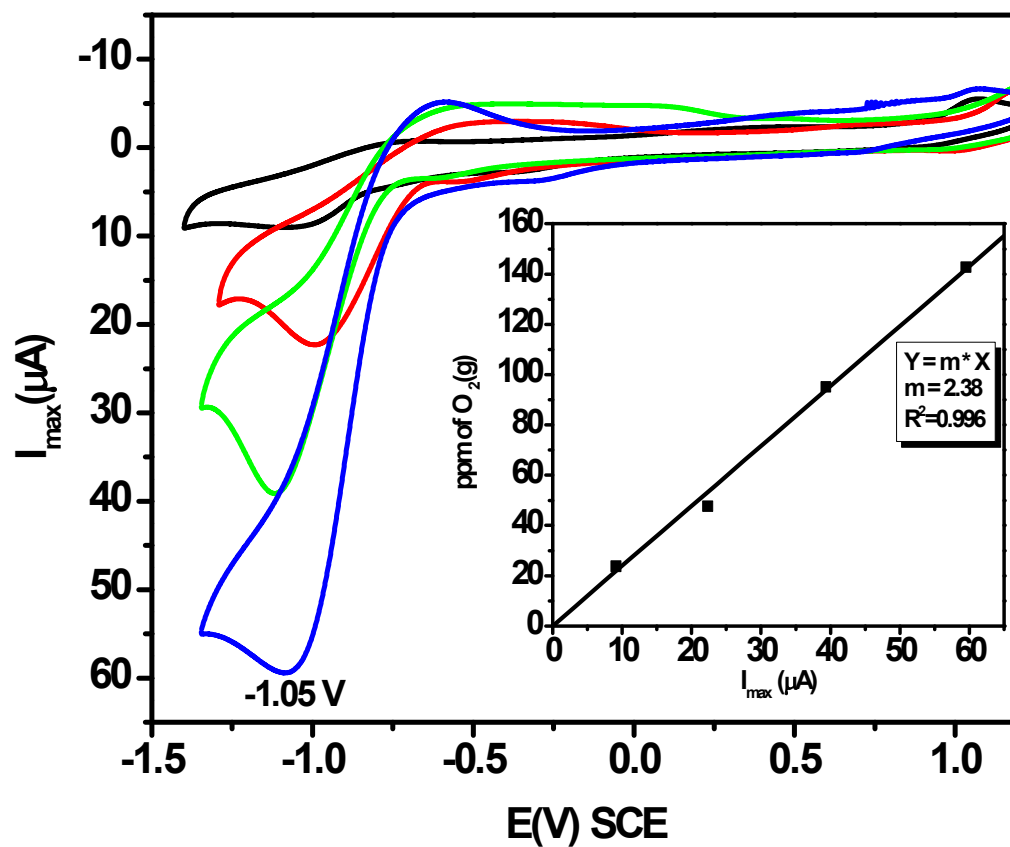

**Fig. S1:** Cyclic voltammograms of  $O_2$  dissolved in 6 mL  $CH_3CN$  solution containing  $(Bu_4N)ClO_4$  as supporting electrolyte at 298 K at a platinum working electrode at a scan rate of  $100\ mV\ s^{-1}$  using SCE as reference electrode:  $[O_2]$  are 0.1 mL (23.83 ppm, black trace), 0.2 mL (47.67 ppm, red trace), 0.4 mL (95.17 ppm, green trace), 0.6 mL (142.83 ppm, blue trace); maximum  $i_{pc}$  observed electrochemically are 9.1, 22.32, 39.30 and 59.49 respectively. Inset: Standardization plot.

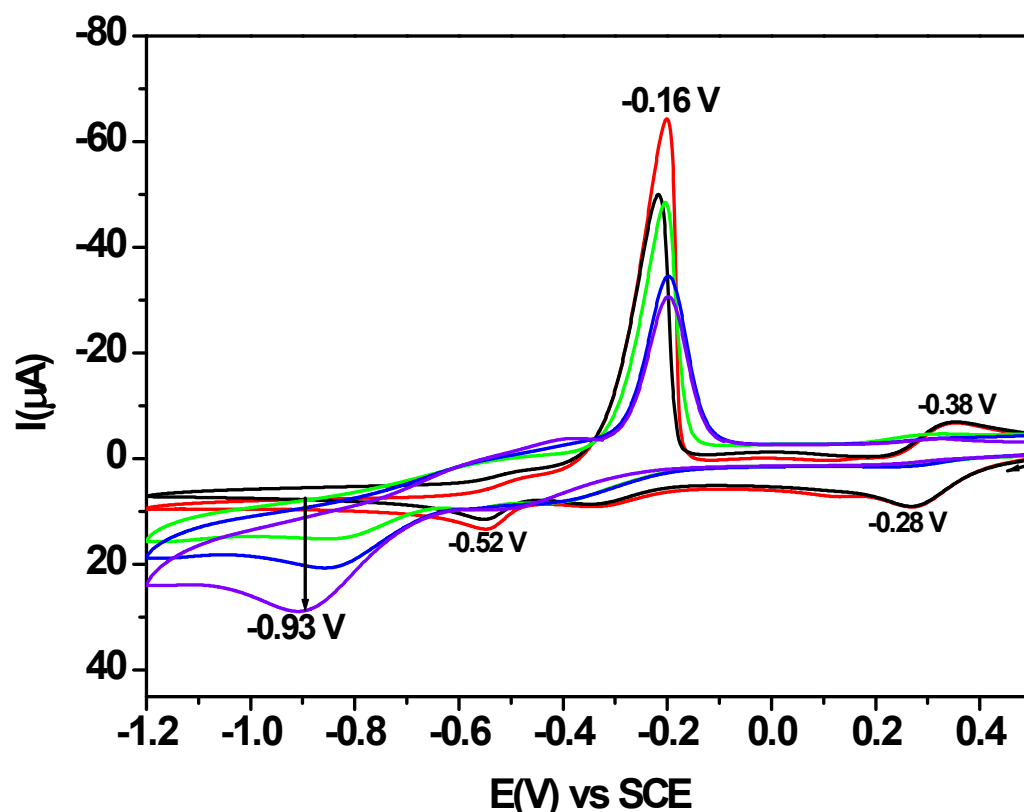

**Fig. 4, Top in the main text:** Cyclic voltammograms in CH<sub>3</sub>CN containing 0.1 M [(*n*-Bu)<sub>4</sub>N]ClO<sub>4</sub> as a supporting electrolyte at 298 K at a platinum working electrode at a scan rate of 100 mV s<sup>-1</sup> using SCE as reference electrode of **1** in CH<sub>3</sub>CN (Black trace), then after adding KO<sub>2</sub> repeated scans until reach to a maximum  $i_{pc}$  (green→blue→violet) at -0.93 V. Red trace after purging of N<sub>2</sub> (g) to complete remove of O<sub>2</sub>(g) produced. Calculated amount of O<sub>2</sub>(g) evolution is 97%.

**Calculation for liberated O<sub>2</sub>(g) from reaction of **2** in 6 mL CH<sub>3</sub>CN with KO<sub>2</sub>.**

$I_{max}$  (A) obtained at -0.93 V after addition of KO<sub>2</sub> to a CH<sub>3</sub>CN solution of 10 mg of **1** (or  $13.16 \times 10^{-3}$  mmol of **1**) = 28.58  $\mu$ A (See Fig. S21). From the slope of the calibration plot (See Fig. S20) this  $I_{max}$  correspond to  $2.38 \times 28.58 = \mathbf{68.02 \text{ ppm}}$  of O<sub>2</sub>(g) that is liberated from a  $13.16 \times 10^{-3}$  mmol of **1** in CH<sub>3</sub>CN.

F.Wt. of **2** = 759.4

**1** + KO<sub>2</sub> = **2** + O<sub>2</sub> (g)

759.4 gm of **1** will liberate 32 gm of O<sub>2</sub> (g) at NTP

Then, 10 mg of **1** will liberate 0.4214 mg of O<sub>2</sub> (g) at NTP

This, 0.4214 mg of O<sub>2</sub>(g) is dissolved in 6 ml of CH<sub>3</sub>CN =  $(0.4214 \times 1000)/6 = \mathbf{70.23 \text{ ppm}}$  of O<sub>2</sub> (g) [ppm = mg/L]

If **70.23 ppm** O<sub>2</sub> (g) liberates then it will be 100% O<sub>2</sub> (g) evolution, however the liberated amount of O<sub>2</sub>(g) is **68.02 ppm**.

Therefore yield % of O<sub>2</sub>(g) evolution =  $(68.02 \times 100)/70.23 = \mathbf{97\%}$

a)

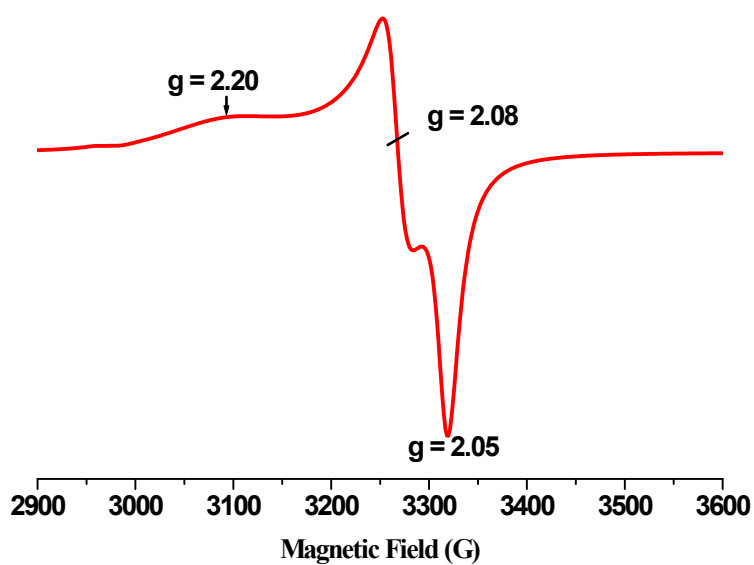

b)

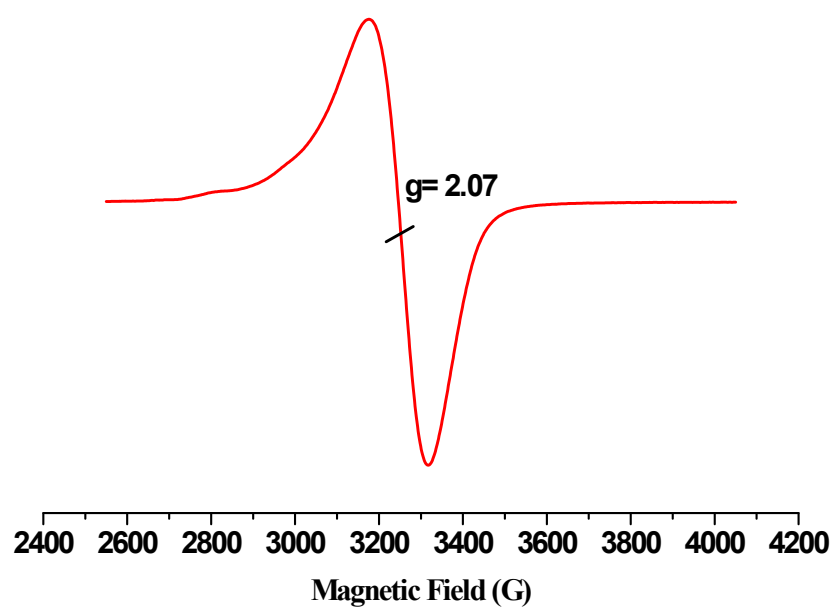

**Fig. S2:** X-Band EPR spectrum of (a) solid **1** at 77 K, (b) of **1** in  $\text{CH}_3\text{CN}$ -toluene solution at 77 K. Spectrometer settings: frequency = 9.456 GHz, power= 0.189 mW, modulation frequency = 100 kHz; modulation amplitude = 5 G and receiver gain =  $1 \times 10^3$  (for solid) and receiver gain =  $1 \times 10^4$  for solution phase measurement.

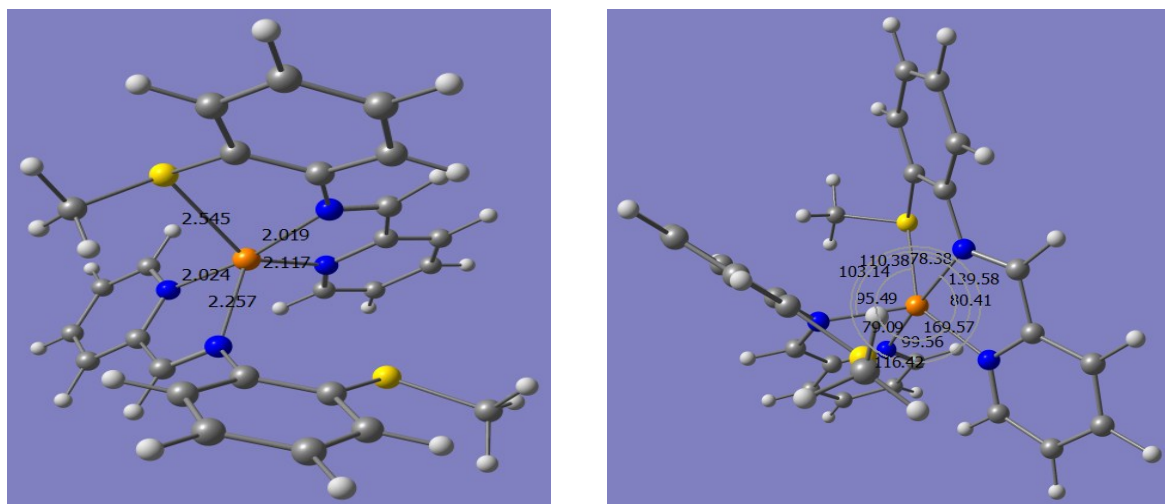

**Fig. S3:** DFT optimized structures of modelled complex  $[(L1)_2Cu]^{2+}$  (Cation of **1**)

| Bond distance (Å)     | DFT optimized structure | Crystal structure (Fig. 1, top) |
|-----------------------|-------------------------|---------------------------------|
| Cu1-N1                | 2.117                   | 2.017(3)                        |
| Cu1-N2                | 2.024                   | 1.958(3)                        |
| Cu1-N3                | 2.019                   | 1.956(3)                        |
| Cu1-N4                | 2.257                   | 2.153(3)                        |
| Cu1-S1                | 2.545                   | 2.4461(10)                      |
| Cu1-S2                | 3.701                   | 3.667(2)                        |
| <b>Bond angle (°)</b> |                         |                                 |
| N1-Cu1-N2             | 80.41                   | 81.73(11)                       |
| N1-Cu1-N3             | 103.14                  | 100.72(11)                      |
| N1-Cu1-N4             | 116.42                  | 119.79(11)                      |
| N1-Cu1-S1             | 139.58                  | 142.37(8)                       |
| N2-Cu1-N3             | 169.57                  | 174.82(12)                      |
| N2-Cu1-N4             | 110.38                  | 102.43(11)                      |
| N2-Cu1-S1             | 78.38                   | 80.29(8)                        |
| N3-Cu1-N4             | 79.09                   | 80.39(11)                       |
| N3-Cu1-S1             | 95.49                   | 95.14(8)                        |
| N4-Cu1-S1             | 99.56                   | 96.30(8)                        |

**Table S1:** Comparison of bond distances and Angles of  $[(L1)_2Cu]^{2+}$  optimized structure and X-ray structure of **1**.

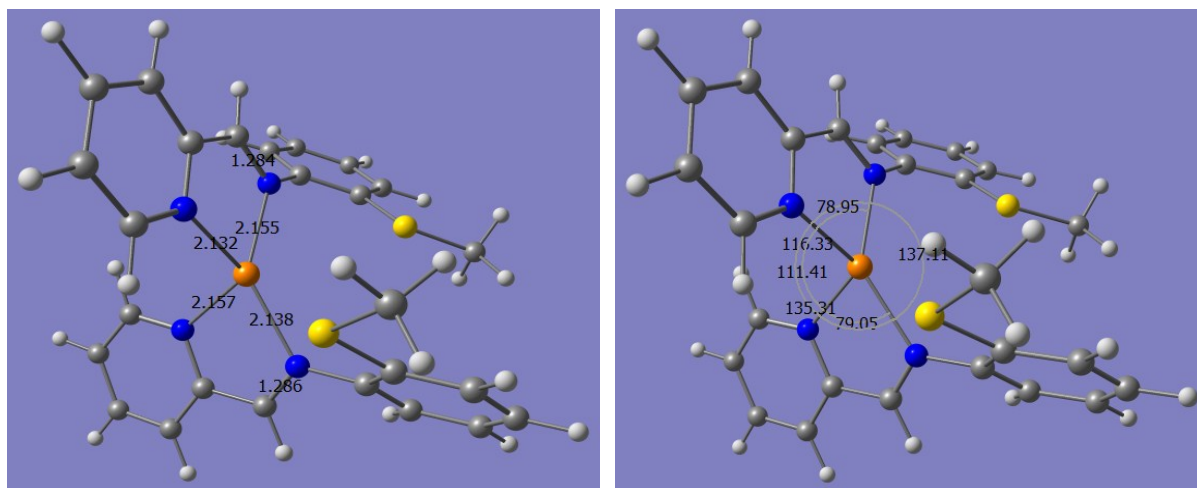

**Fig. S4:** DFT optimized structures of modelled complex of  $[(L1)_2Cu]^+$  (Cation of **2**)

| Bond distance (Å)     | Optimized Structure | Crystal Structure (Fig.1, bottom) |
|-----------------------|---------------------|-----------------------------------|
| Cu1-N1                | 2.132               | 2.093(6)                          |
| Cu1-N2                | 2.155               | 2.019(5)                          |
| Cu1-N3                | 2.138               | 2.029(5)                          |
| Cu1-N4                | 2.157               | 2.112(4)                          |
| Cu1-S1                | 3.477               | 3.212(2)                          |
| Cu1-S2                | 3.357               | 3.173(2)                          |
| <b>Bond angle (°)</b> |                     |                                   |
| N1-Cu1-N2             | 79.05               | 80.7(2)                           |
| N1-Cu1-N3             | 111.41              | 106.3(2)                          |
| N1-Cu1-N4             | 116.33              | 112.8(2)                          |
| N2-Cu1-N3             | 137.41              | 138.7(2)                          |
| N2-Cu1-N4             | 135.31              | 135.02(19)                        |
| N3-Cu1-N4             | 78.95               | 80.86(18)                         |

**Table S2:** Comparison of bond distances and Angles of  $[(L1)_2Cu]^+$  optimized structure and X-ray structure of **2**.

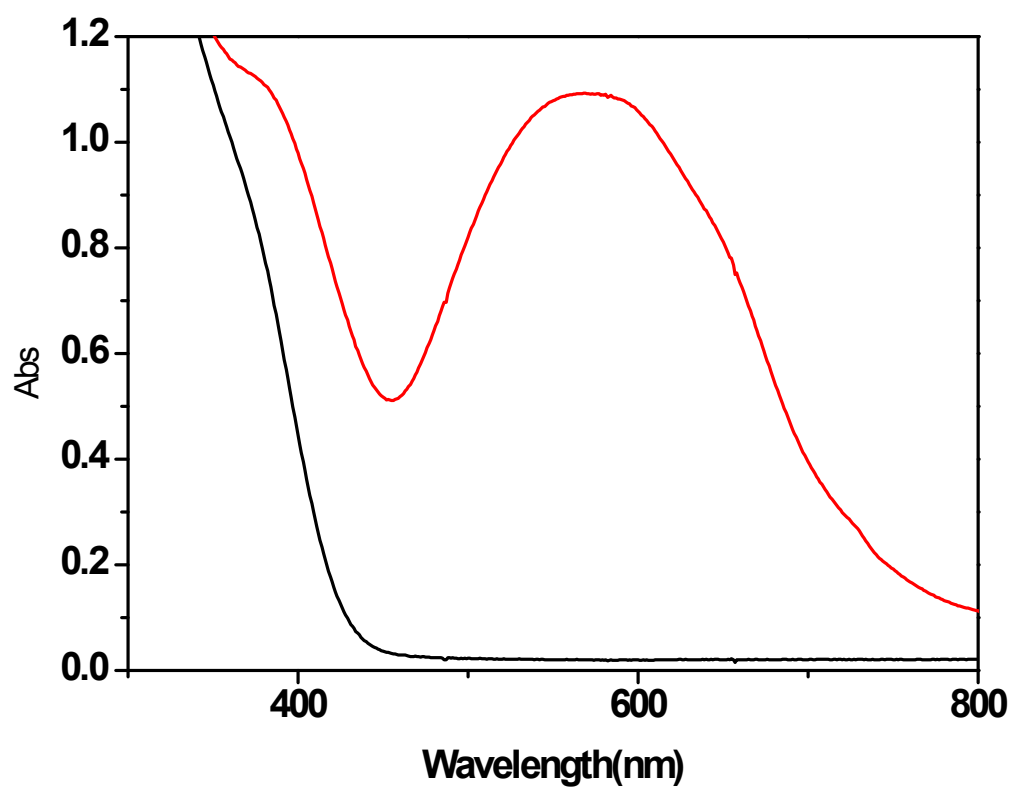

**Fig. S5:** UV-Vis spectra of 0.030 mM NBT (black trace) and NBT+ DMSO solution of 50 equiv.  $\text{KO}_2$  (Red trace) taken in NEM buffer at PH 7.4.



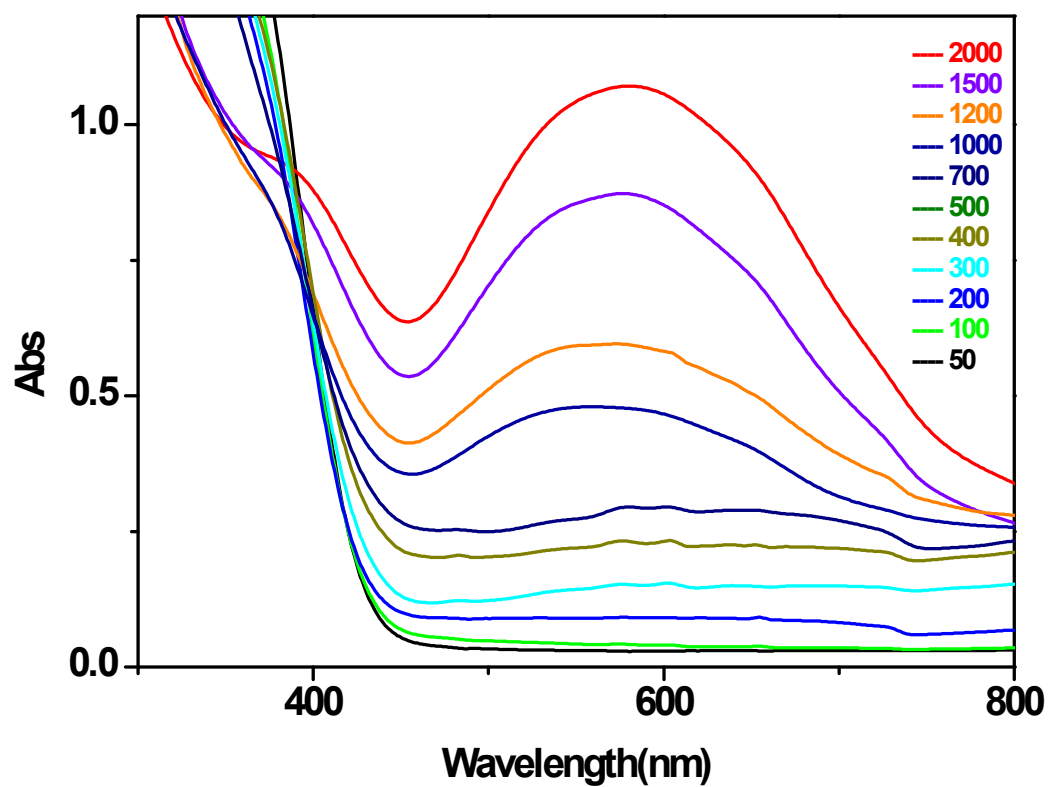

**Fig. S6:** UV-Vis spectral changes of NBT, treated with various amount of  $\text{KO}_2$  in presence of **1** (black→red traces) in NEM buffer at PH 7.4. The numerical values 50 to 2000 are the equivalent amount of  $\text{KO}_2$ , added to 1 equivalent of complex **1**.

### Calculation for % inhibition of NBT assay:

Kinetically the reduction of NBT to formazane has been determined following the absorbance changes at  $\lambda = 560$  nm using the following equation.

$$\% \text{ Inhibition} = \{[(\Delta A_{560\text{nm}}/\text{minutes})_{\text{blank}} - (\Delta A_{560\text{nm}}/\text{minutes})_{\text{sample}}] / (\Delta A_{560\text{nm}}/\text{minutes})_{\text{blank}}\} \times 100$$

$$\Delta A_{560\text{nm}}/\text{minutes} = [A_{560\text{nm}} \text{ at time } 4:30 \text{ minutes} - A_{560\text{nm}} \text{ at } 0:30 \text{ minutes}] / 4$$

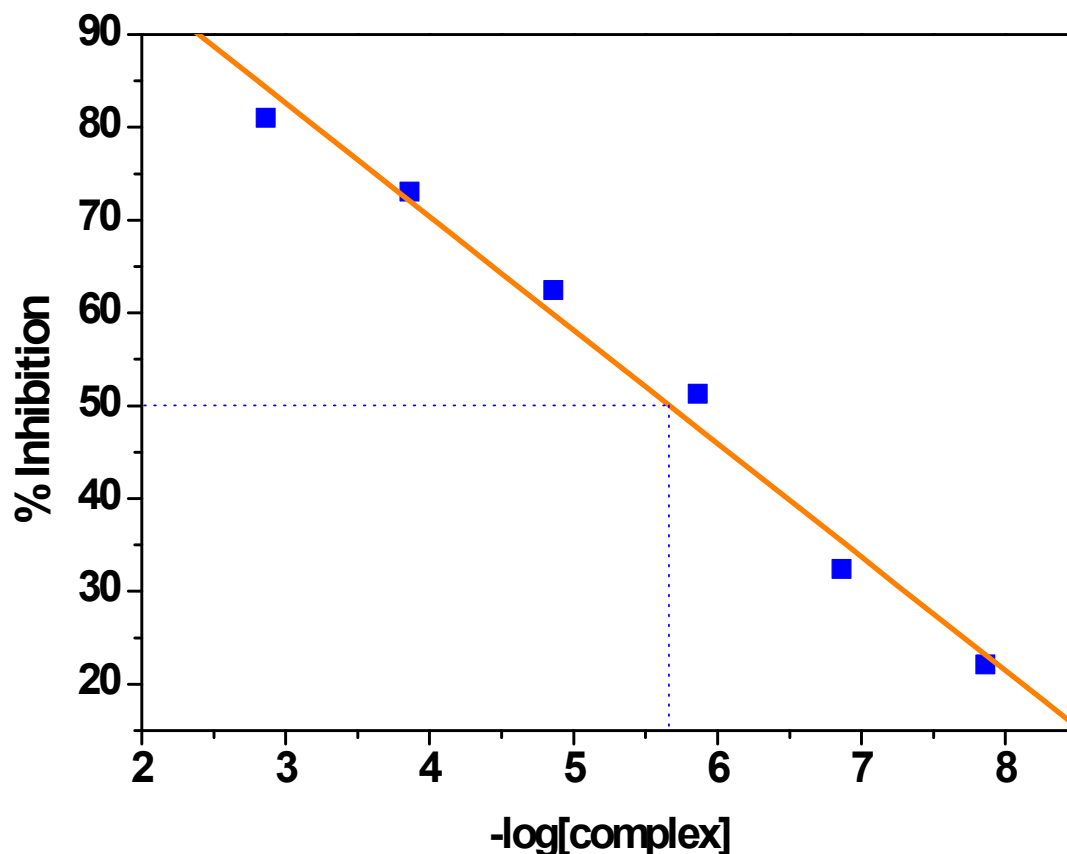

**Fig. S7:** % inhibition of NBT vs  $-\log[\text{complex } 1]$  plot. The position of 50% inhibition has been shown using dotted lines.

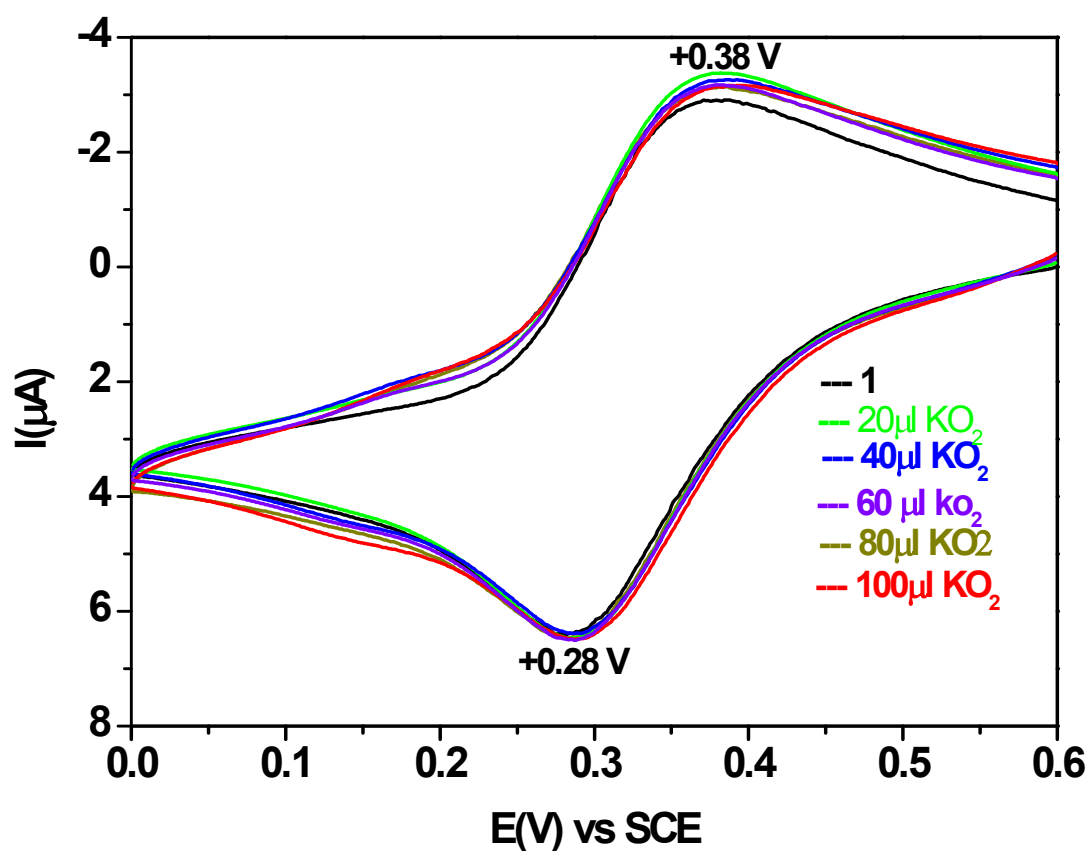

**Fig. S8:** Cyclic voltammograms of **1** in CH<sub>3</sub>CN containing 0.1M [(nBu)<sub>4</sub>N]ClO<sub>4</sub> as a supporting electrolyte at 298K at a Pt working electrode at 50 mV s<sup>-1</sup> using SCE as reference electrode. Stoichiometric KO<sub>2</sub> was dissolved in 100μl CH<sub>3</sub>OH, then 20 μL aliquots were added and after each addition the CV scan was taken.

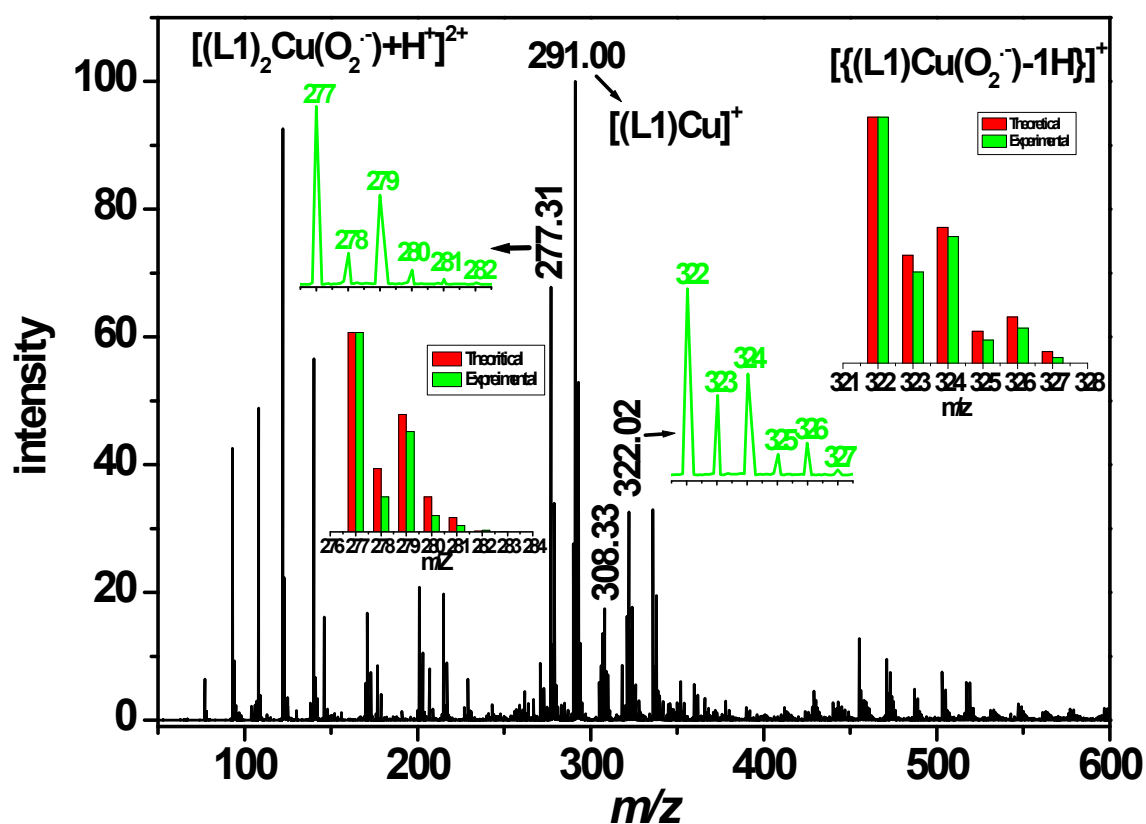

**Fig. S9:** ESI positive mass spectrum of a solution mixture of **1** +  $KO_2$  made at 233 K in  $CH_3CN$  then quickly measured at 298 K. Peak at  $m/z$  = 277.31, 291.0037, 308.0098 and 322.02 corresponds to  $[(L1)_2Cu(O_2)+1H]^+{}^{2+}$ ,  $[(L1)Cu]^+$ ,  $[(L1)Cu(O_2)Cu(L)]^{2+}$  and  $[(L1)Cu(O_2)-1H]^+$  respectively. Inset: Isotopic mass distribution, experimental (green) and simulated (red trace) of the corresponding peak marked with arrow.

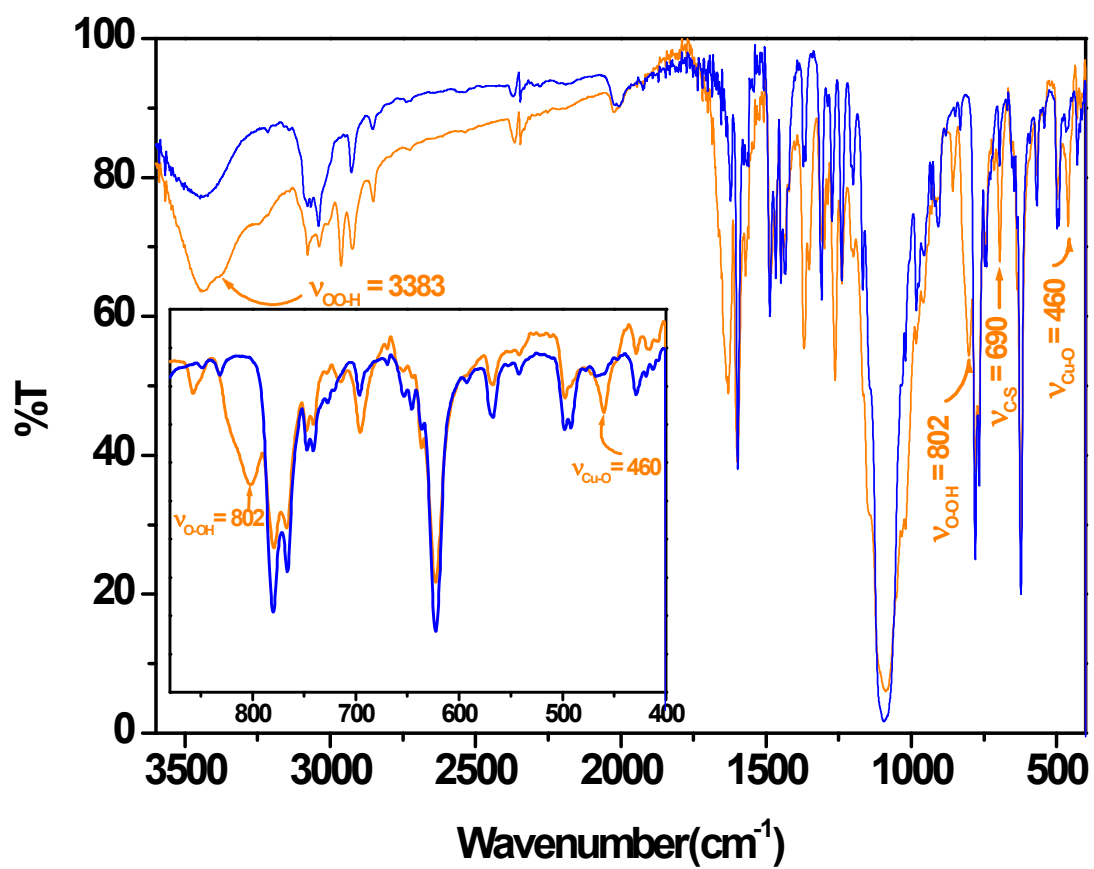

**Fig. S10:** FTIR spectra of  $[(L1)_2Cu](ClO_4)_2 \cdot CH_3CN, 1 \cdot CH_3CN$ , (blue trace) and  $[(L1)_2Cu(OOH \cdot)](ClO_4)$  (orange trace) in KBr disk, shown in the range 400  $cm^{-1}$ -3600  $cm^{-1}$ .

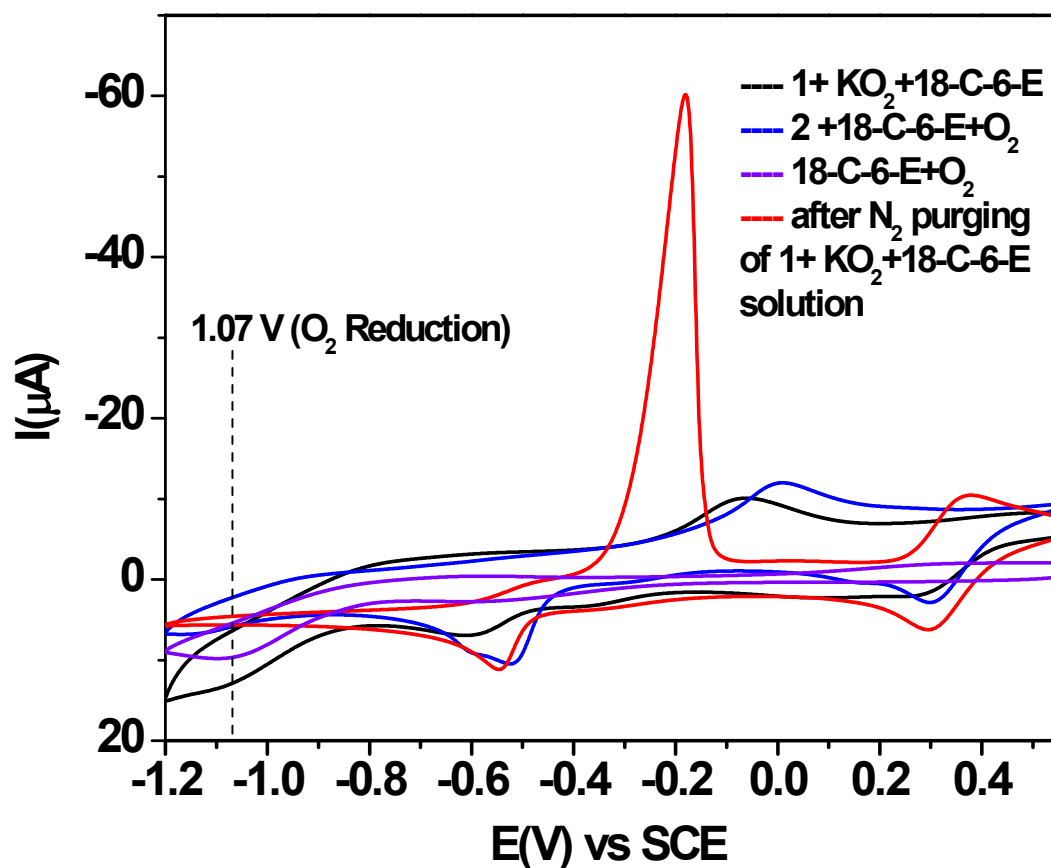

**Fig. S11:** Cyclic voltammograms in  $\text{CH}_3\text{CN}$  containing 0.1 M  $[(n\text{-Bu})_4\text{N}]\text{ClO}_4$  as a supporting electrolyte at 233 K at a platinum working electrode at a scan rate of 100  $\text{mV s}^{-1}$  using SCE as reference electrode of 1+ $\text{KO}_2$ +18-C-6-E in  $\text{CH}_3\text{CN}$  (Black trace), 2 +18-C-6-E+ $\text{O}_2$  (blue trace), 18-C-6-E+ $\text{O}_2$  (violet trace), after  $\text{N}_2$  purging to the mixture of 1+ $\text{KO}_2$ +18-C-6-E i.e. 1+ $\text{KO}_2$ +18-C-6-E +  $\text{N}_2$  (red trace).

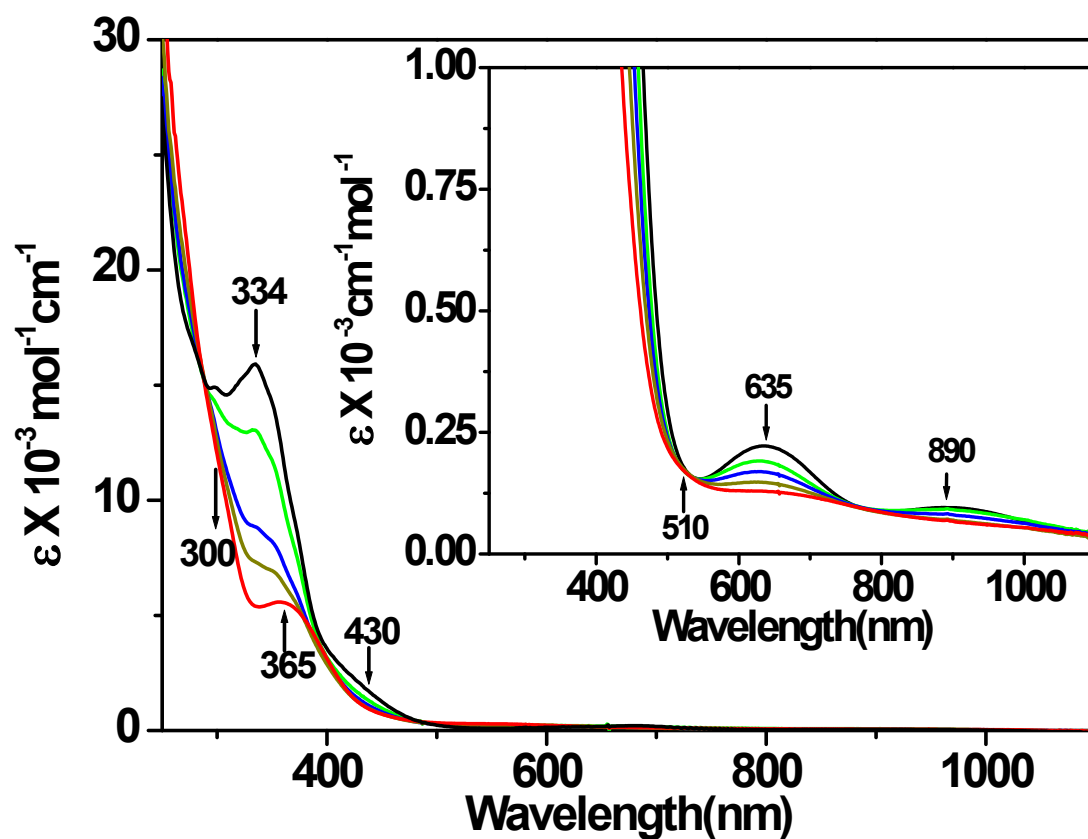

**Fig. S12:** UV-Vis absorption traces showing conversion of a  $\text{CH}_3\text{CN}$  solution of **1** ( $1 \times 10^{-4}$  M, black trace) +  $\text{KO}_2$  + 18C6E  $\rightarrow$  **2** (red trace) at 233 K, inset:  $[\mathbf{1}] = 1 \times 10^{-3}$  M. One equiv. of  $\text{KO}_2$  and 18C6E together was dissolved in  $\text{CH}_3\text{CN}$  then added and after each time addition spectrum taken.

a)

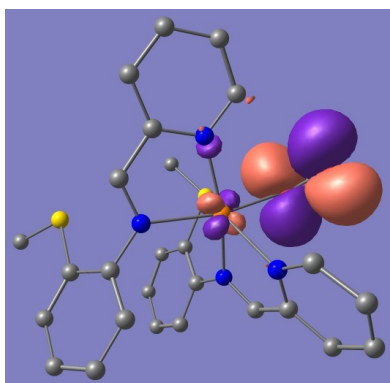HOMO( $\alpha$ )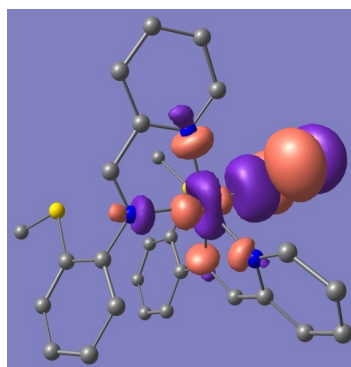LUMO( $\alpha$ )

|                  | MO number | Energy (ev)  | Ligand contribution (%) | Metal contribution (%) | Oxygen contribution (%) |
|------------------|-----------|--------------|-------------------------|------------------------|-------------------------|
| HOMO( $\alpha$ ) | 137       | -0.298404083 | 8.2                     | 3.6                    | 88.2                    |
| LUMO( $\alpha$ ) | 138       | -0.231471565 | 17.3                    | 25.965                 | 56.73                   |

b)

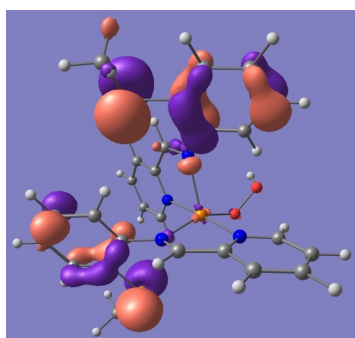HOMO( $\alpha$ )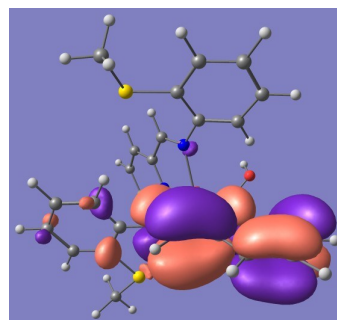LUMO( $\alpha$ )

|                  | MO number | Energy (ev)  | Ligand contribution (%) | Metal contribution (%) | Oxygen contribution (%) |
|------------------|-----------|--------------|-------------------------|------------------------|-------------------------|
| HOMO( $\alpha$ ) | 138       | -0.305387341 | 96.705                  | 1.675                  | 1.62                    |
| LUMO( $\alpha$ ) | 139       | -0.19335202  | 95.234                  | 4.05                   | 0.716                   |

**Fig. S13:** Spin density plot of HOMO and LUMO of DFT optimized modelled structure of (a)  $[(L1)_2Cu(O_2^{\cdot-})]^+$  and of (b)  $[(L1)_2Cu(OOH^{\cdot-})]^+$ . Metal, ligand and oxygen orbital contribution has been shown for each modelled structure in the Tables.



| <b>[(L)<sub>2</sub>Cu<sup>II</sup>O<sub>2</sub>·<sup>-</sup>]<sup>+</sup></b> |              |
|-------------------------------------------------------------------------------|--------------|
| <b>Bond distances(Å)</b>                                                      |              |
| Cu1-N1                                                                        | 2.176        |
| Cu1-N2                                                                        | 2.207        |
| Cu1-N3                                                                        | 2.099        |
| Cu1-N4                                                                        | 2.203        |
| Cu1-O1                                                                        | 2.070        |
| <b>O1-O2</b>                                                                  | <b>1.261</b> |
| <b>Bond Angles(°)</b>                                                         |              |
| N1-Cu1-N2                                                                     | 108.39       |
| N1-Cu1-N3                                                                     | 78.76        |
| N1-Cu1-N4                                                                     | 97.23        |
| N1-Cu1-O1                                                                     | 168.05       |
| N2-Cu1-N3                                                                     | 122.35       |
| N2-Cu1-N4                                                                     | 77.31        |
| N2-Cu1-O1                                                                     | 82.49        |
| N3-Cu1-N4                                                                     | 160.30       |
| N3-Cu1-O1                                                                     | 91.49        |
| N4-Cu1-O1                                                                     | 89.87        |

**Table S3:** Bond distances and Bond Angles of DFT optimized structure of [(L)<sub>2</sub>Cu<sup>II</sup>O<sub>2</sub>·<sup>-</sup>]<sup>+</sup>.

| <b>[(L)<sub>2</sub>Cu<sup>II</sup>-OOH]<sup>+</sup></b> |              |
|---------------------------------------------------------|--------------|
| <b>Bond distances(Å)</b>                                |              |
| Cu1-N1                                                  | 2.357        |
| Cu1-N2                                                  | 2.091        |
| Cu1-N3                                                  | 2.075        |
| Cu1-N4                                                  | 2.199        |
| Cu1-O1                                                  | 1.966        |
| <b>O1-O2</b>                                            | <b>1.425</b> |
| <b>Bond angles(°)</b>                                   |              |
| N1-Cu1-N2                                               | 105.54       |
| N1-Cu1-N3                                               | 76.46        |
| N1-Cu1-N4                                               | 92.87        |
| N1-Cu1-O1                                               | 108.59       |
| N2-Cu1-N3                                               | 175.48       |
| N2-Cu1-N4                                               | 77.51        |
| N2-Cu1-O1                                               | 92.09        |
| N3-Cu1-N4                                               | 98.42        |
| N3-Cu1-O1                                               | 91.08        |
| N4-Cu1-O1                                               | 158.08       |

**Table S4:** Bond distances and Bond Angles of DFT optimized structure of [(L)<sub>2</sub>Cu<sup>II</sup>O<sub>2</sub>H]<sup>+</sup>.

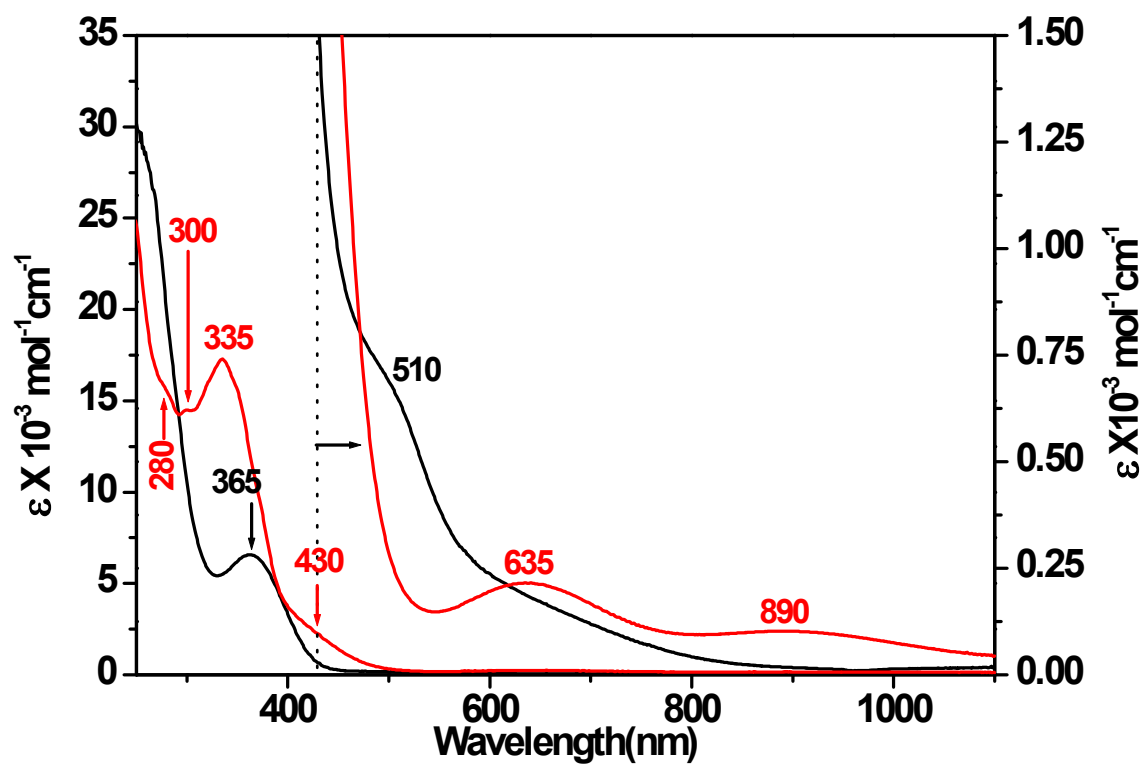

**Fig. S14:** UV-Vis spectra of  $[(L1)_2Cu](ClO_4)_2 \cdot CH_3CN$ , **1**· $CH_3CN$ , (red trace) and  $[(L1)_2Cu](ClO_4)_2$ , **2**, (black trace) in  $CH_3CN$ .

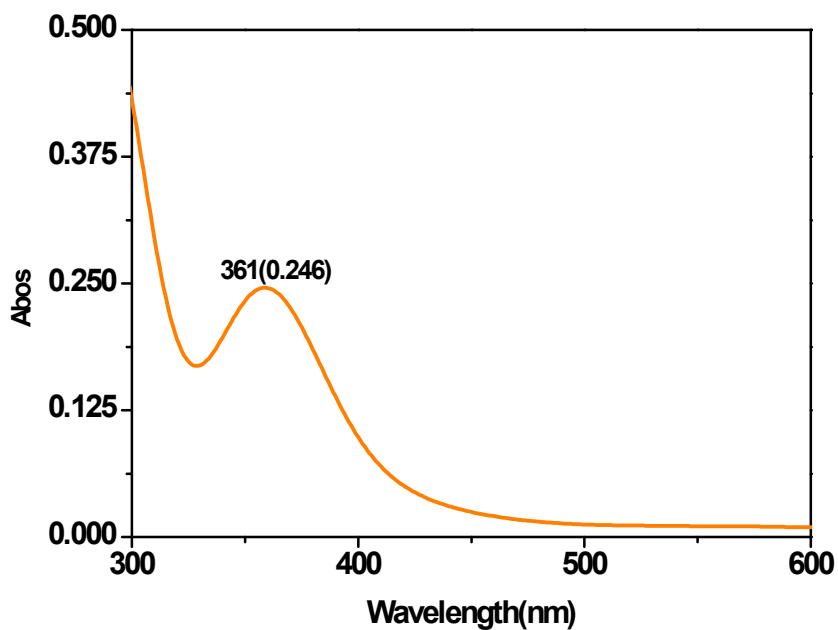

**Fig. S15:** UV-Vis spectrum of  $I_3^-$  generated from the reaction  $2 + KO_2 + 2HClO_4 + (\text{excess}) NaI \rightarrow I_3^-$ . ( $2 + KO_2 + 2HClO_4 \rightarrow 1 + H_2O_2$ ,  $H_2O_2 + HClO_4 + I^- \rightarrow I_2$ ,  $I_2 + I^- \rightarrow I_3^-$ ).

**Calculation for the amount of  $H_2O_2$  liberated from reaction:**

Concentration of **2** =  $10^{-4}$  M

$\epsilon = 2.5 \times 10^4 \text{ M}^{-1} \text{ cm}^{-1}$

$A = 0.246$

Hence  $C = (\epsilon/A) \text{ M}$

$= (0.246 / 2.5 \times 10^4) \text{ M}$

$= 0.098 \times 10^{-4} \text{ M}$

Since the solution was diluted 10 times

Hence concentration of  $H_2O_2 = (0.098 \times 10^{-4}) \text{ M} \times 10$

$= 0.98 \times 10^{-4} \text{ M}$

Hence % of  $H_2O_2$  = **98 %**.

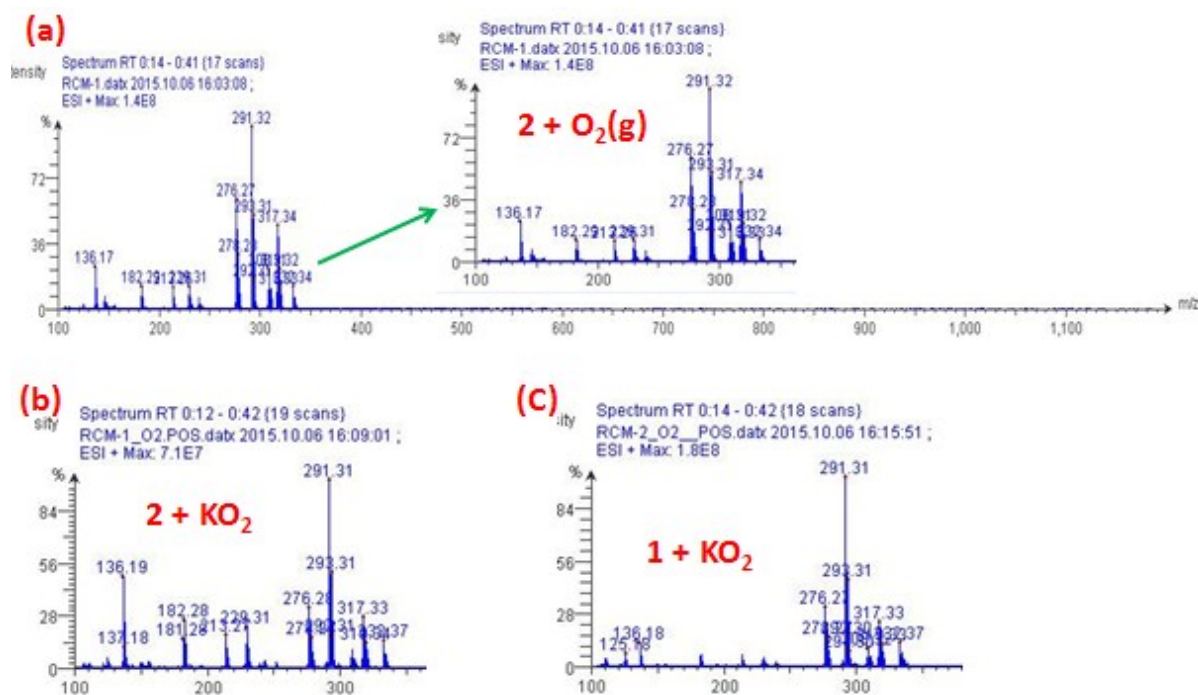

**Fig. S16:** ESI positive mass spectrum of **1** and **2** in the range 100-1200: CH<sub>3</sub>CN solution of **1** and **2** were frozen at 77 K, (a) To frozen solution of **1** + O<sub>2</sub>(g), (b) frozen solution of **2** + KO<sub>2</sub>, (c) frozen solution of **1** + KO<sub>2</sub> when melt the sample injected for mass spectrum. Spectral profile looks same for all three reactions indicates progress to achieve the final [(L1)<sub>2</sub>Cu(OOH)]<sup>+</sup> product. So we did the higher resolution mass spectra of (b), see **Fig. S9**: for peak assignment.

**This experiment support, [(L1)<sub>2</sub>Cu]<sup>+</sup> + O<sub>2</sub> → {(L1)<sub>2</sub>Cu(O<sub>2</sub>·)}<sup>+</sup> ↔ {(L1)<sub>2</sub>Cu(O<sub>2</sub><sup>2-</sup>)} → [(L1)<sub>2</sub>Cu(OOH)]<sup>+</sup> conversion.**
